# Supplementary material for: Statistical identification of gene association by CID in application of constructing ER regulatory network
Source: PubMed Central journal article supplement (PMC2679734; doi:10.1186/1471-2105-10-85), 2009-03-17

## Additional file 2

Liu *et al.*, 2009.

This file contains graphical illustration of analyses in 48A for those genes appeared in *gene set I*. Four plots for each gene represent four tests (CID-ESR1, CID-ER, GPCC, and STT), respectively. The number in the parentheses after the gene names are their feature numbers in Agilent Human 1A (version 2) oligonucleotide microarray.

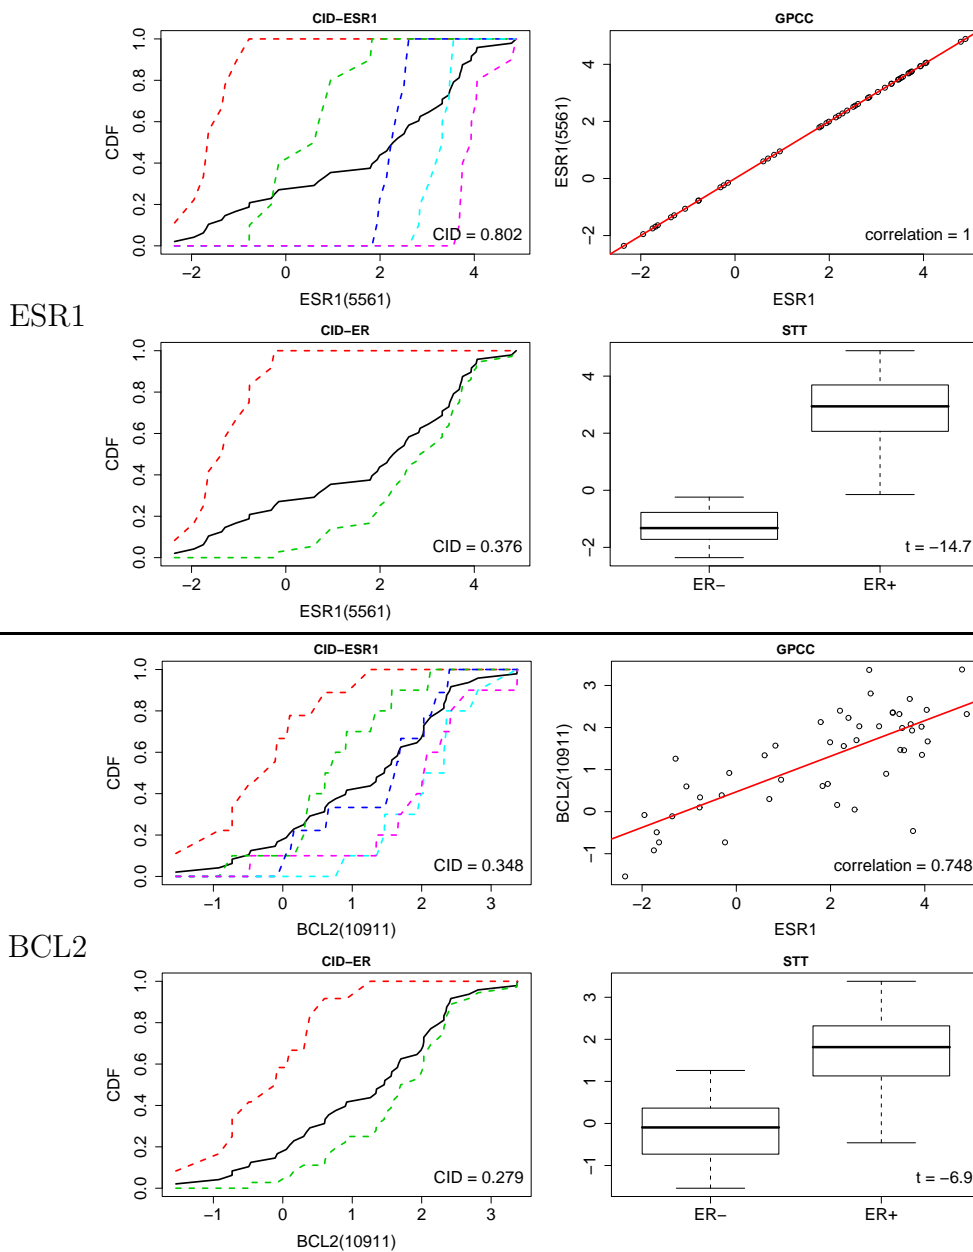

PGR

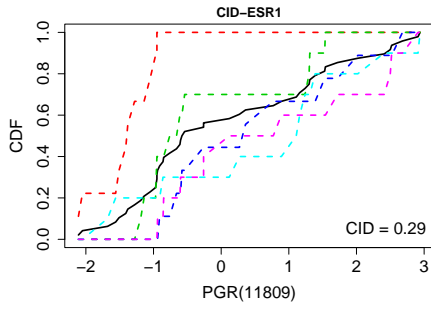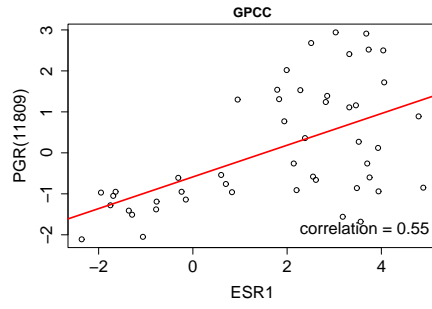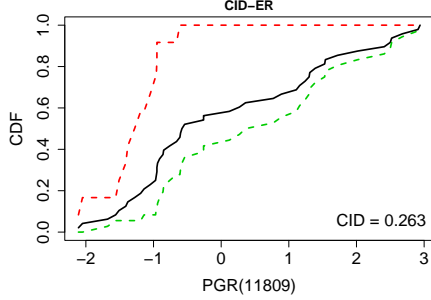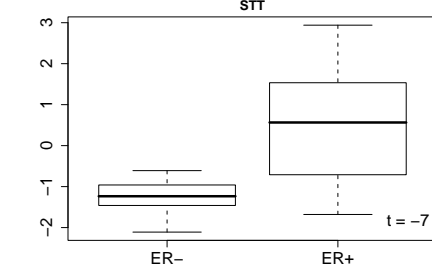

IGF1

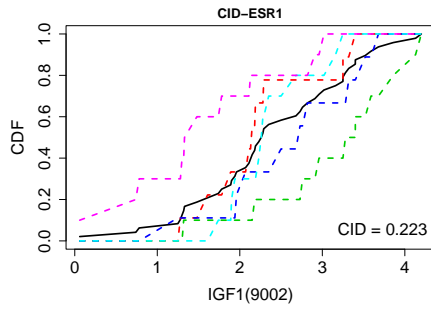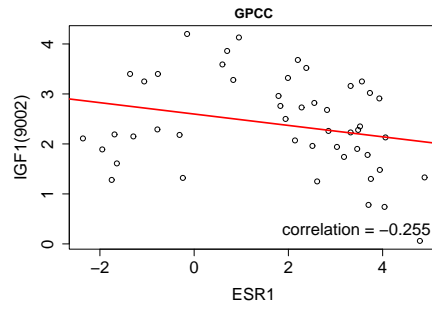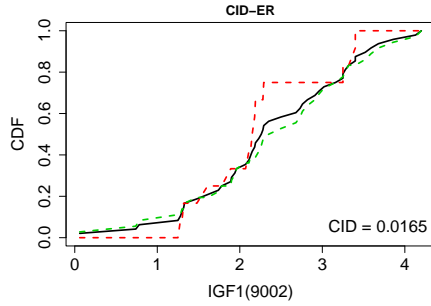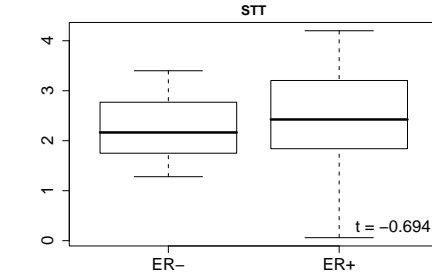

LCN2

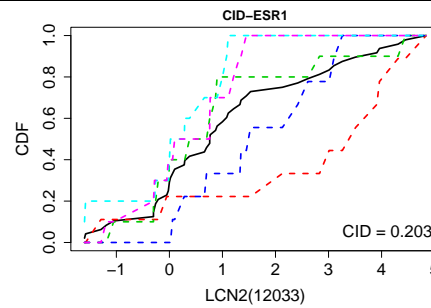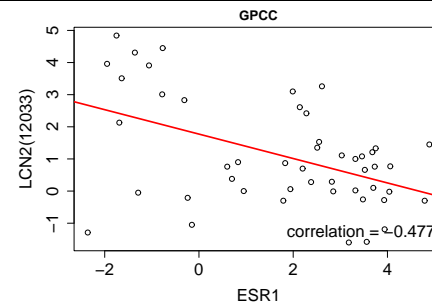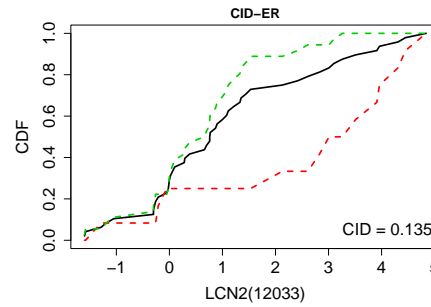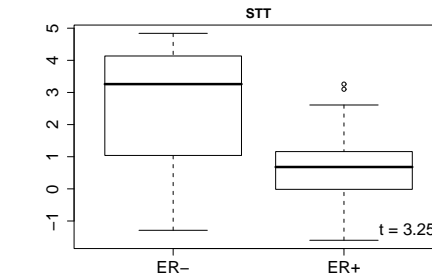

EGFR

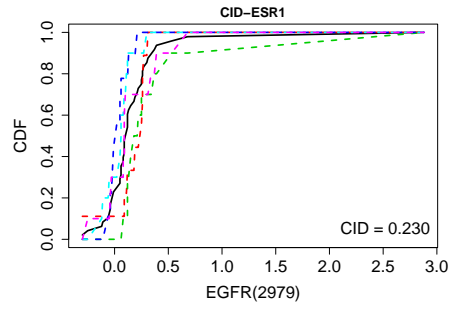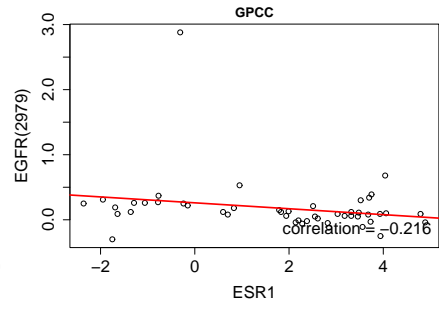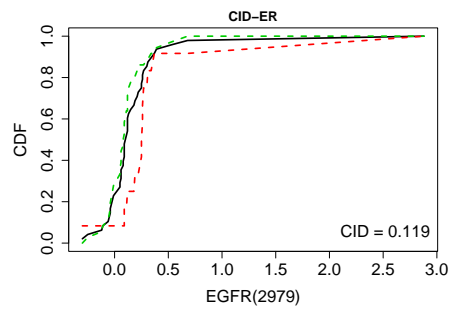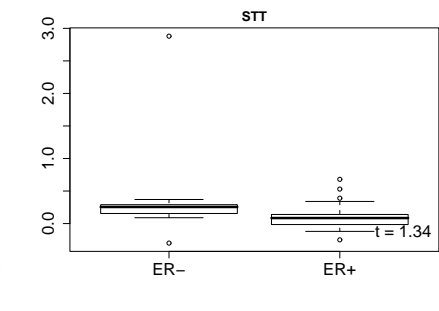

PTMA

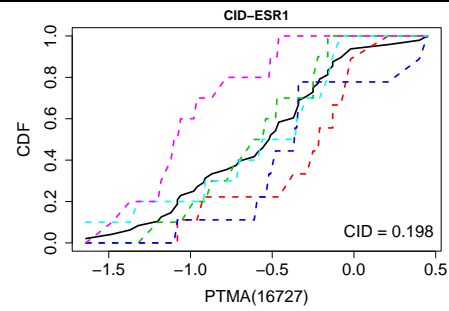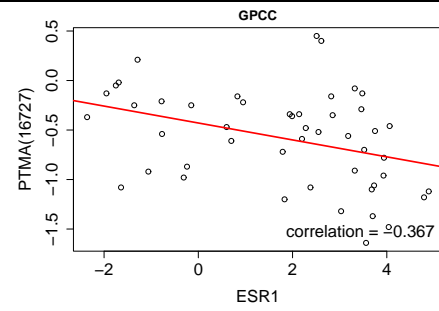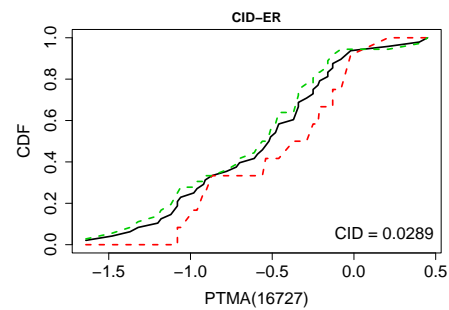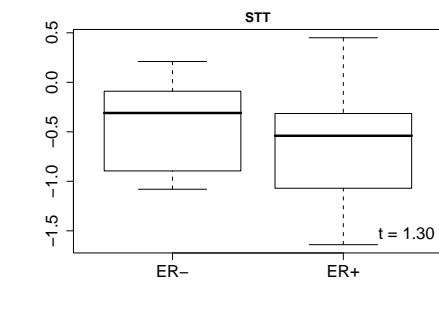

RAGE

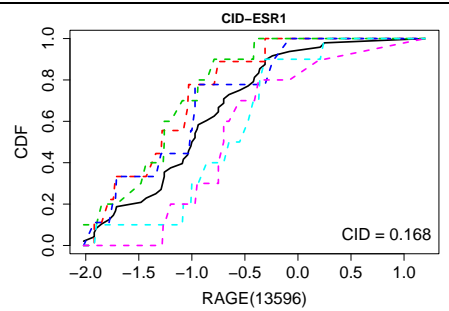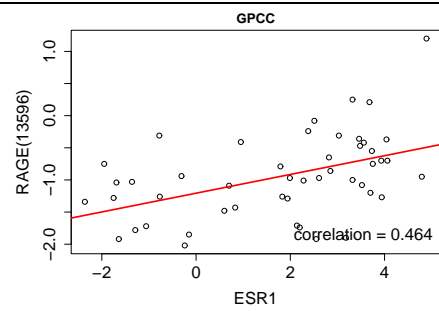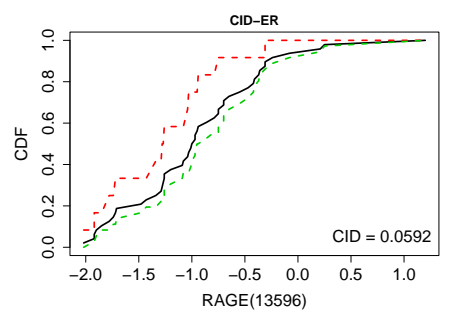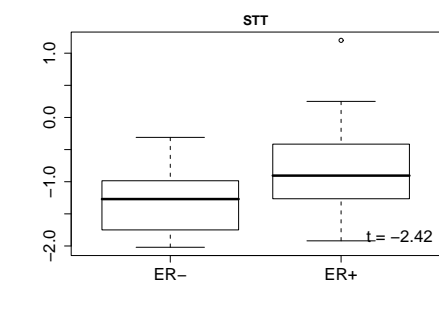

C3

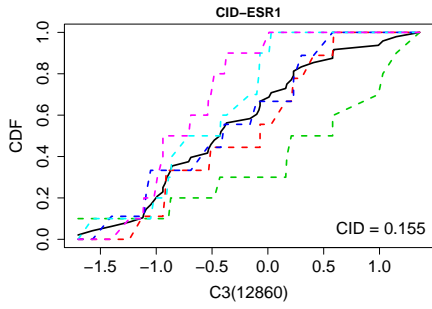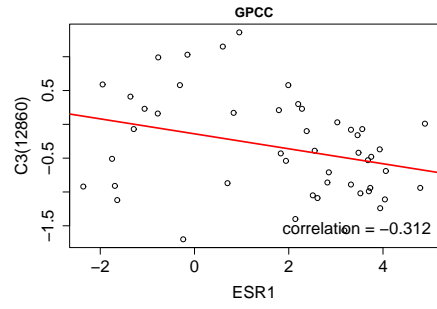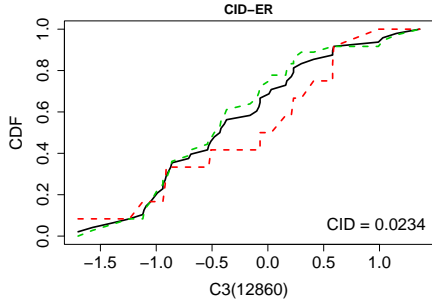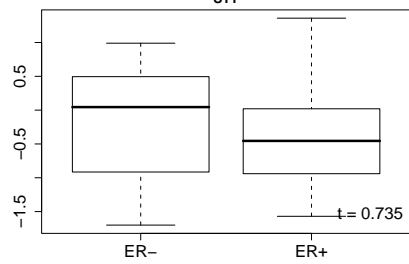

RARA

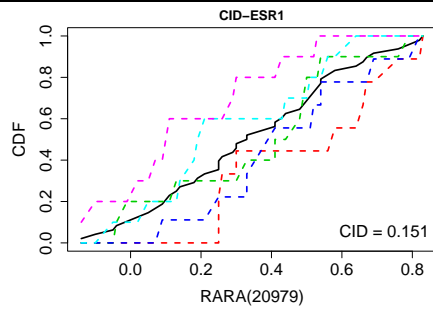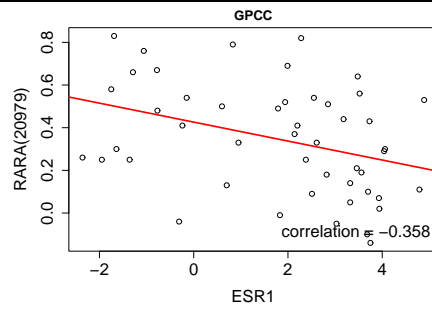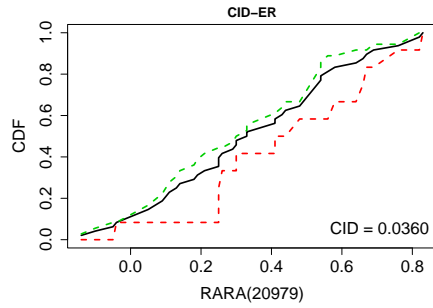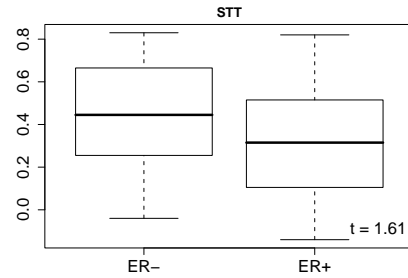

BRCA1

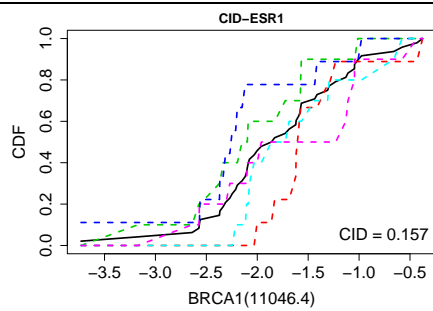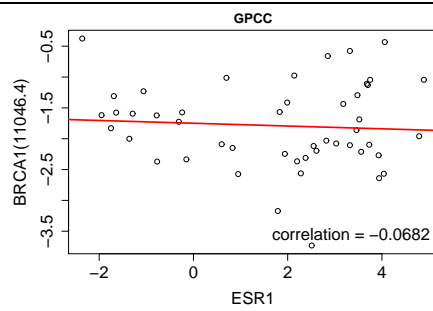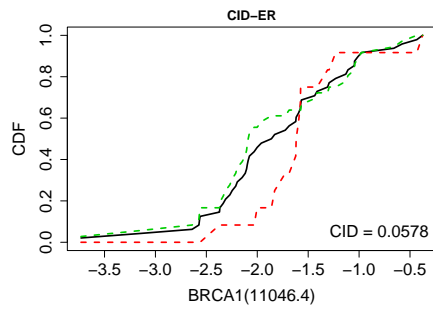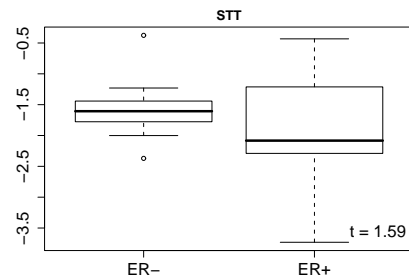

TGFA

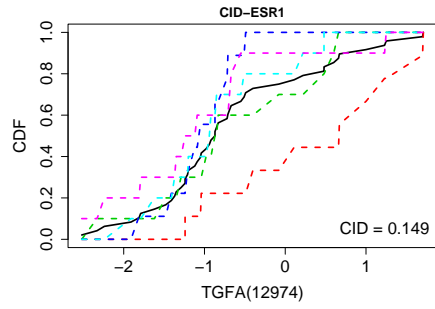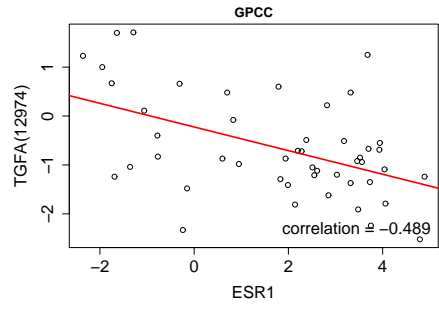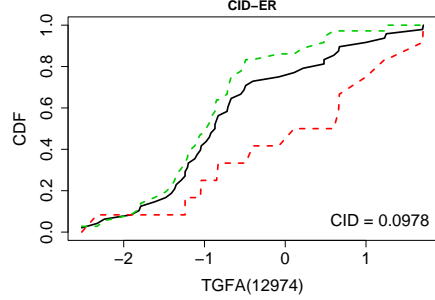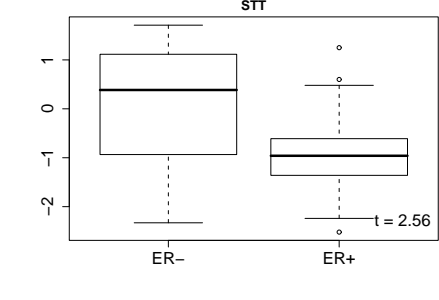

VEGF

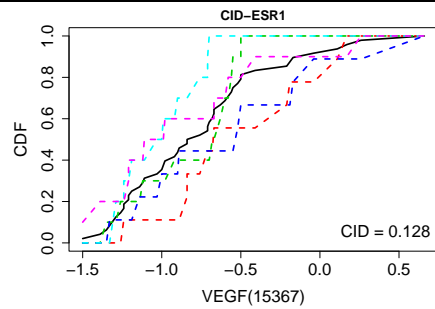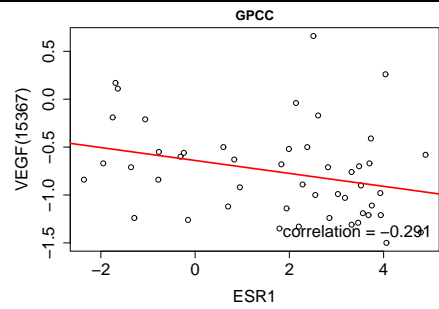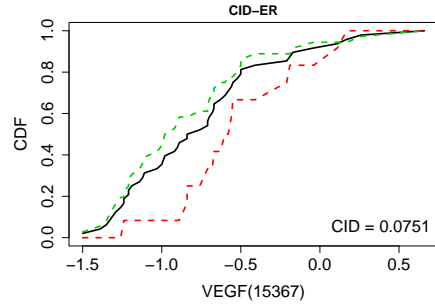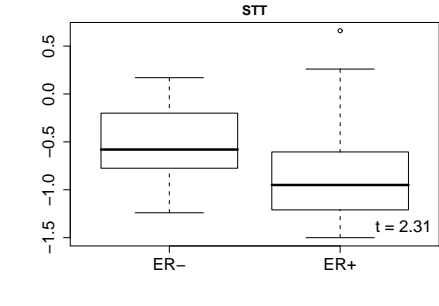

IGFBP4

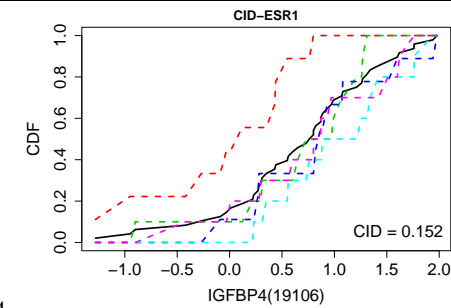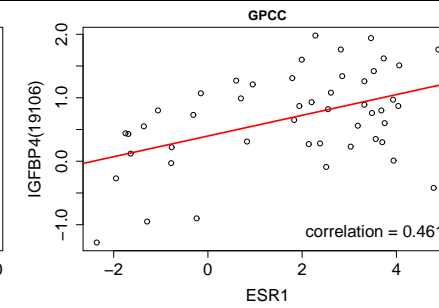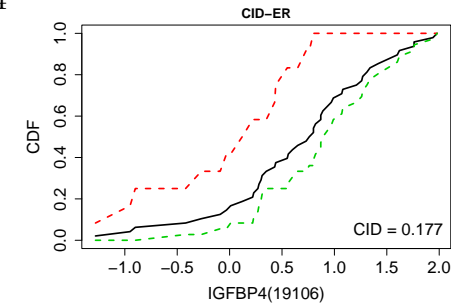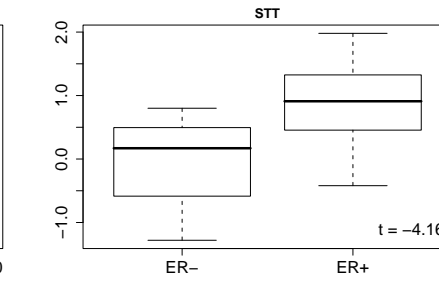

### HSPB1

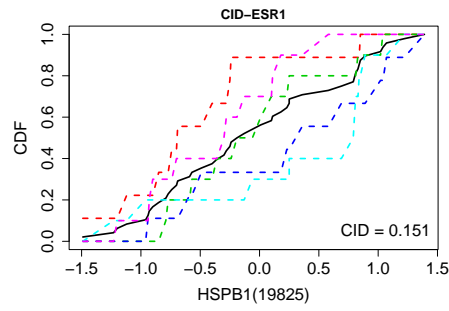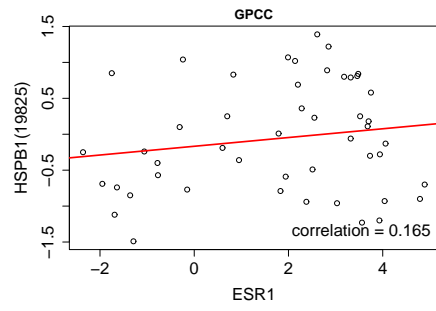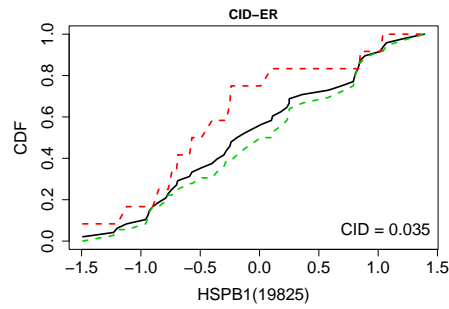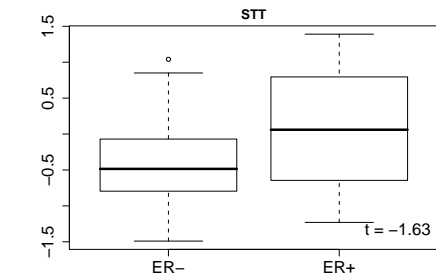

### TFF1

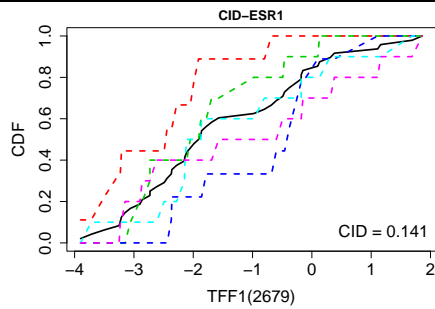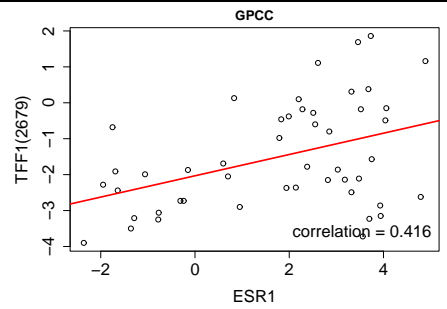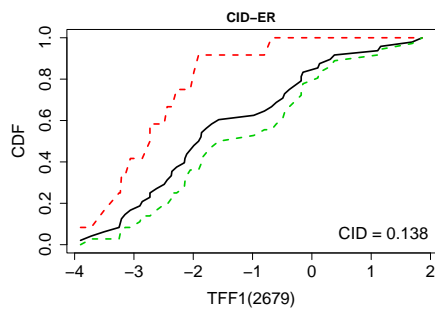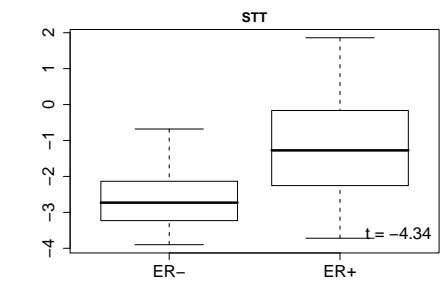

### GRIN1

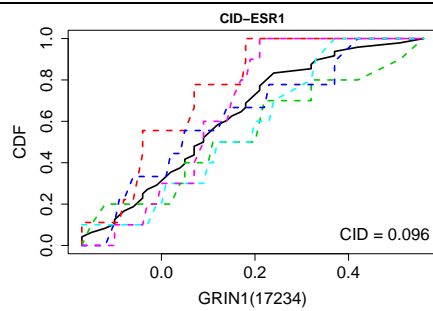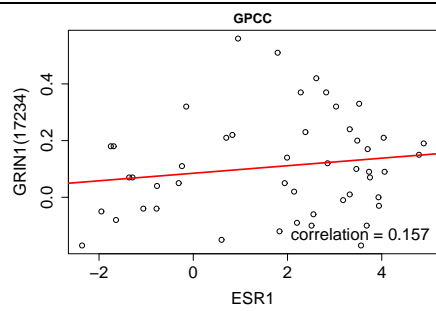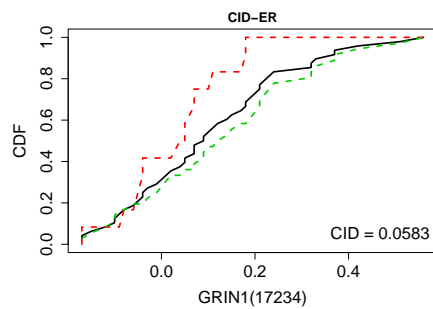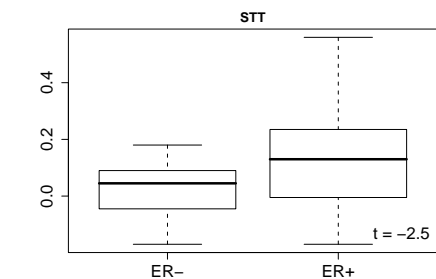

COX7A2L

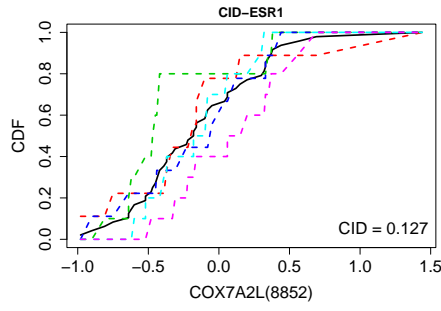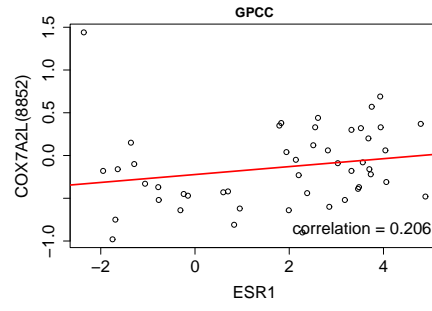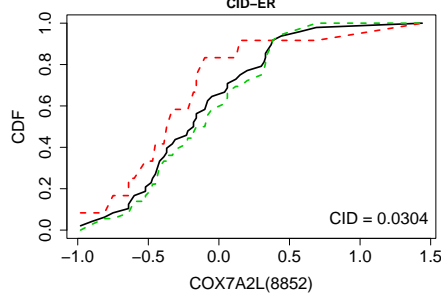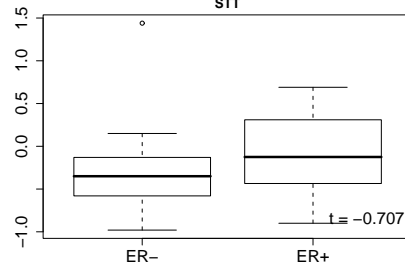

TYMS

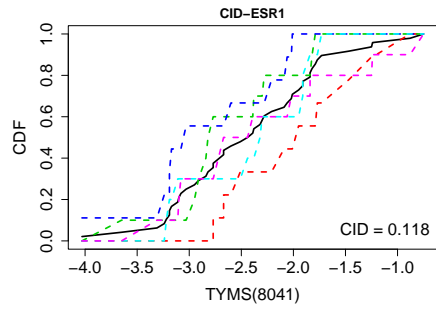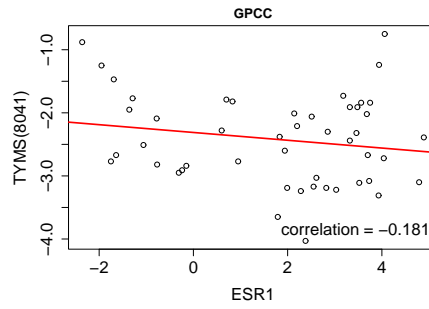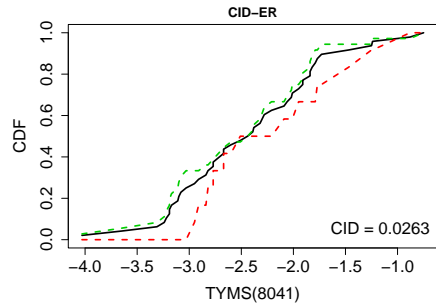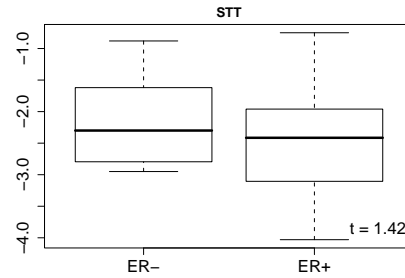

ADARB1

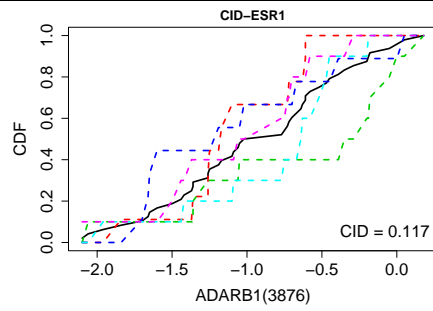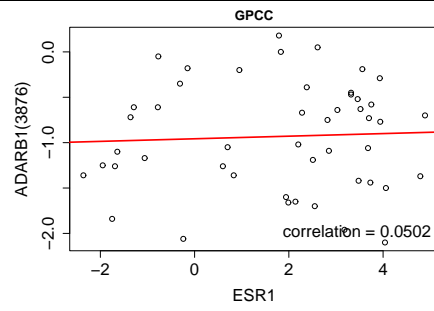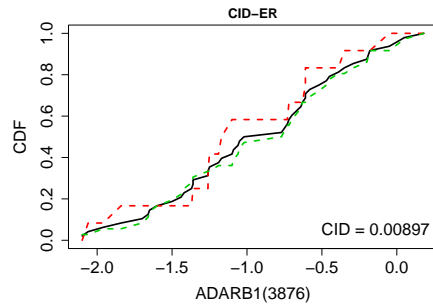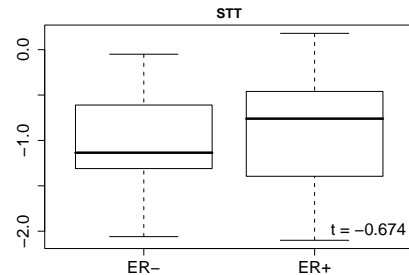

FOS

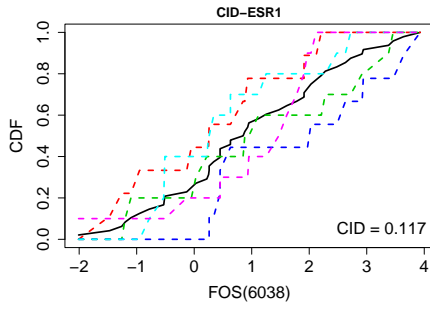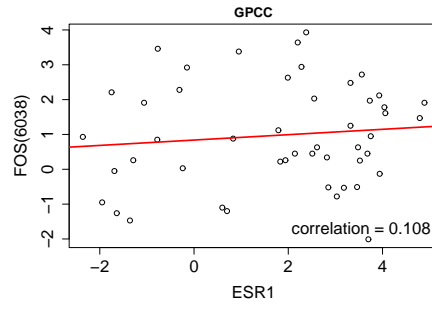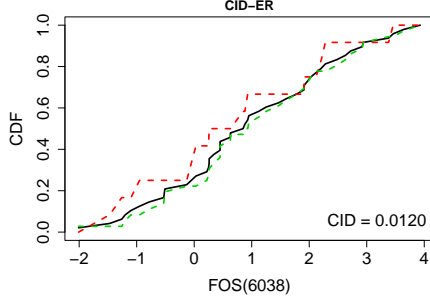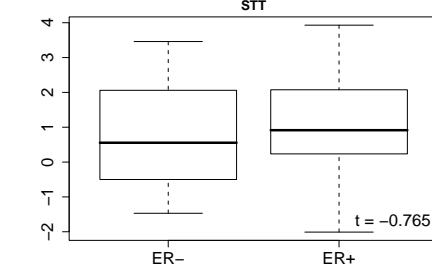

OXT

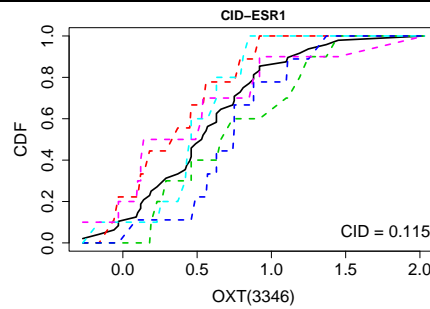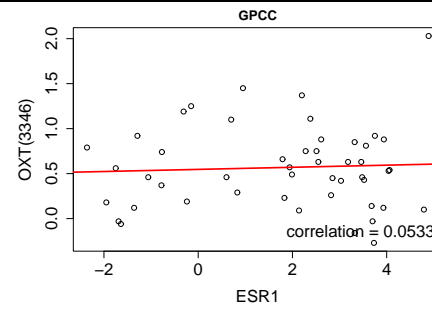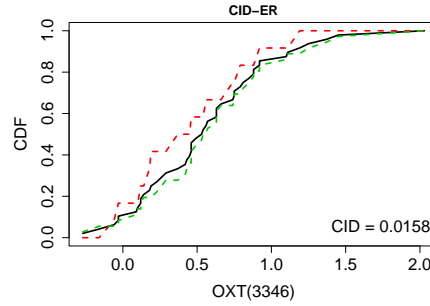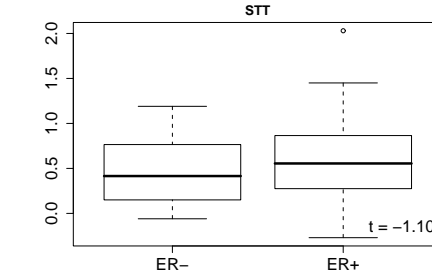

KRT19

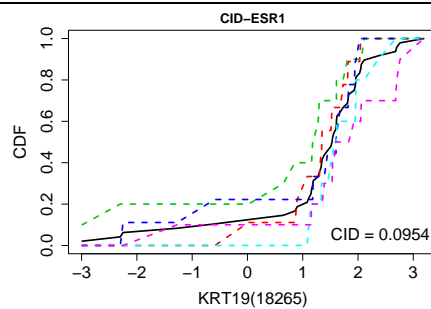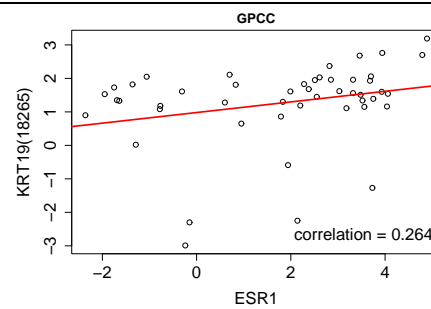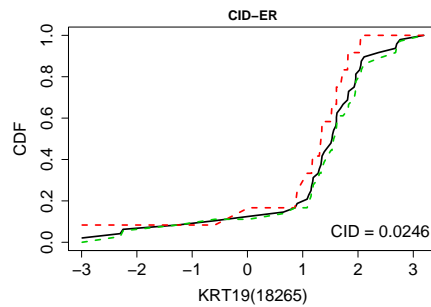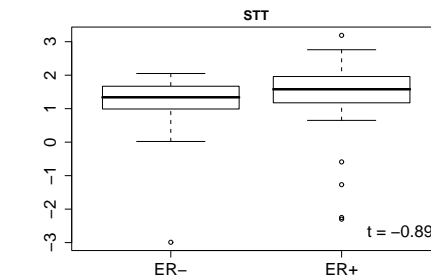



TERT

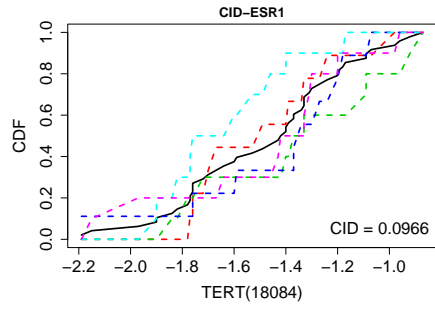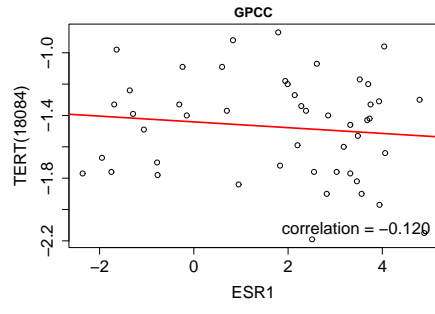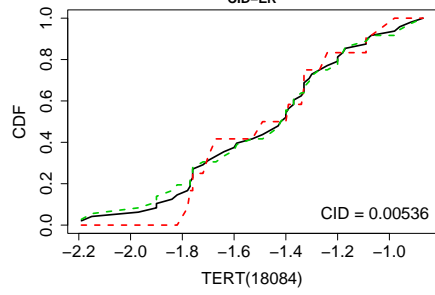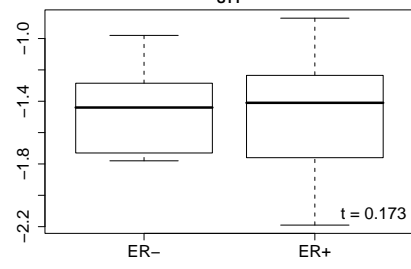

MYC

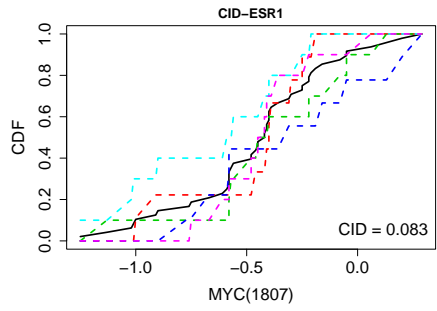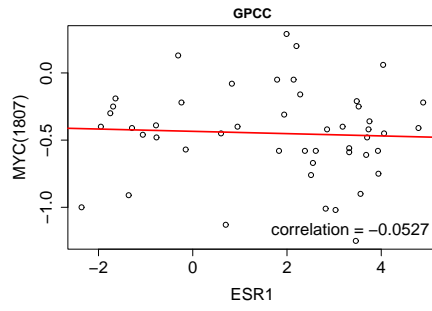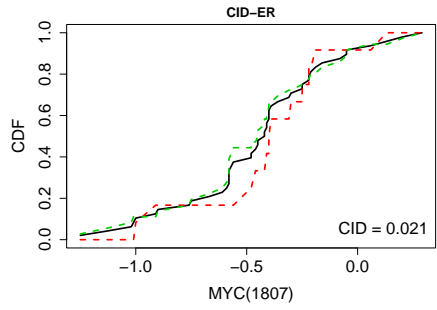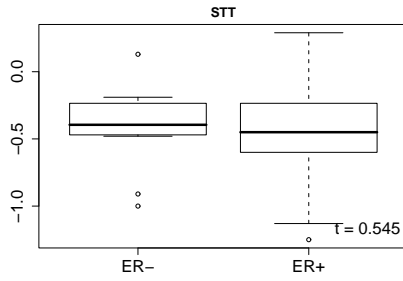

LTF

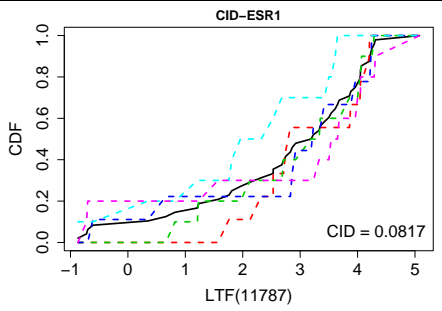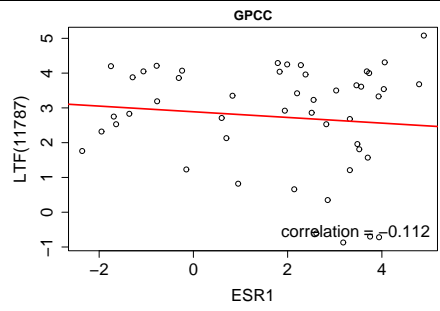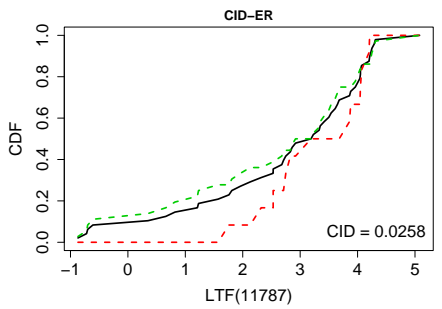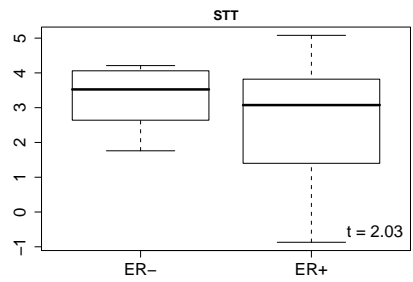

CTSD

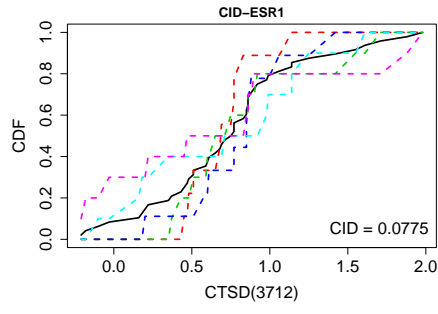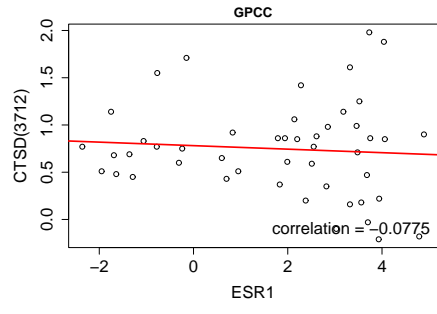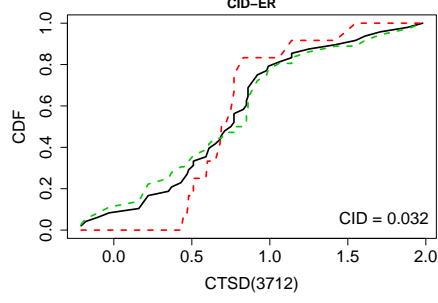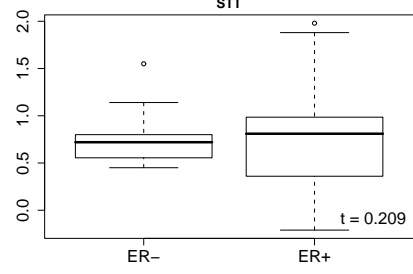

OVGP1

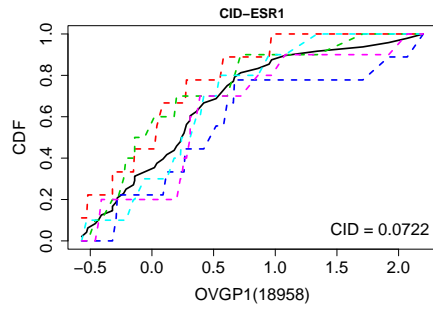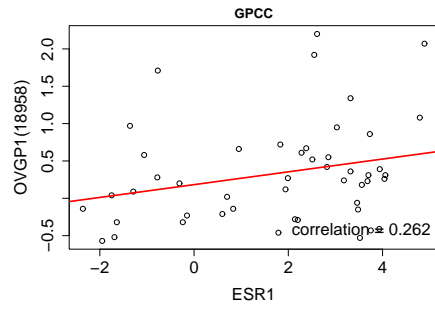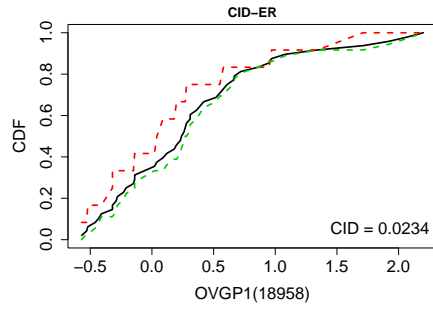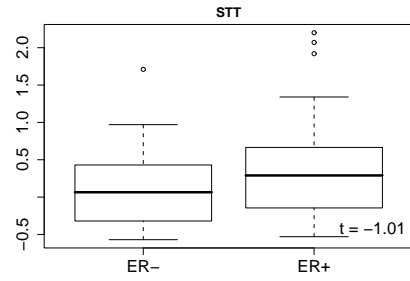

EBAG9

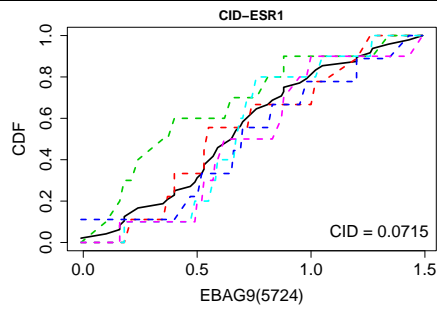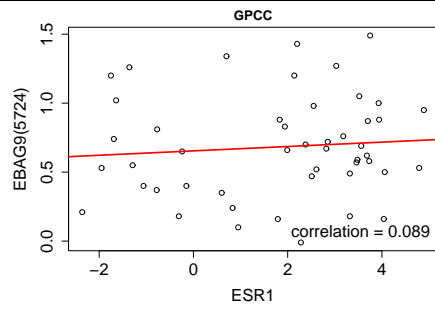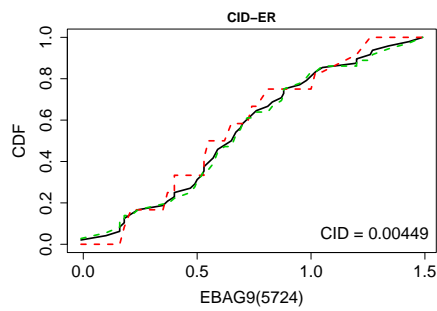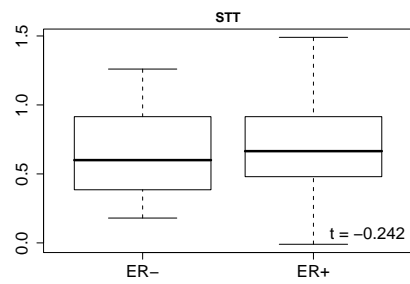

LDLR

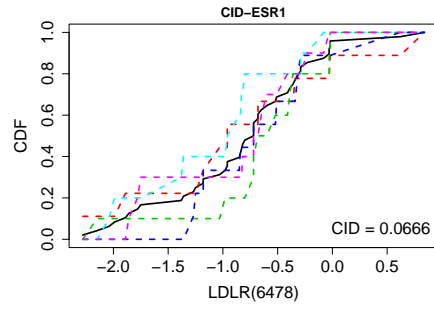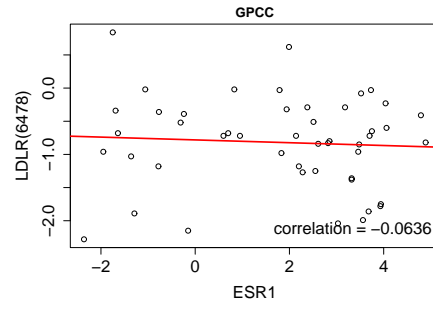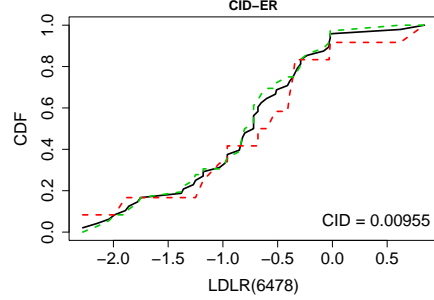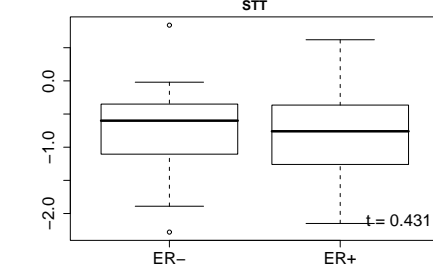

F12

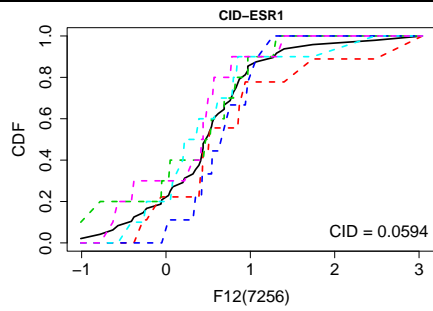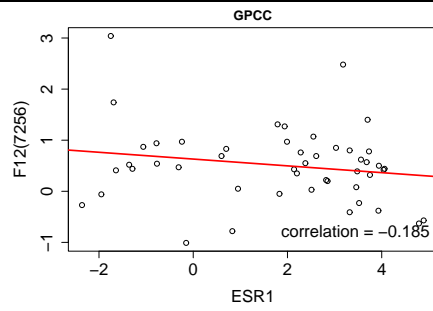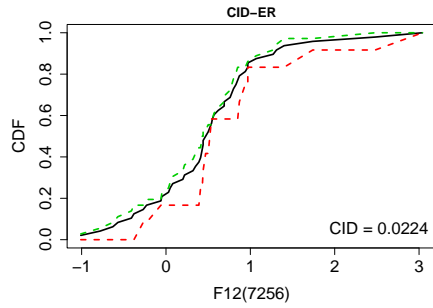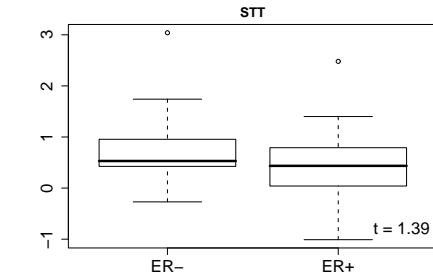

AGT

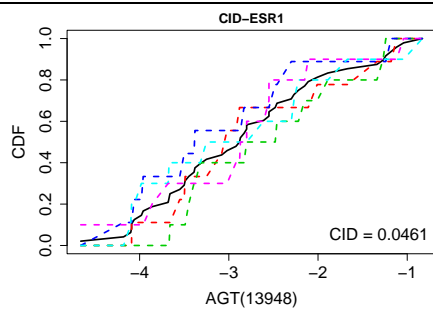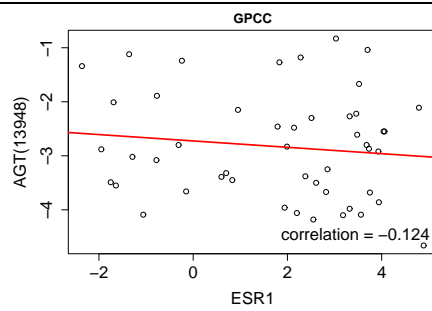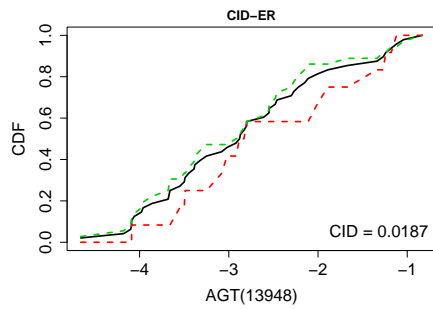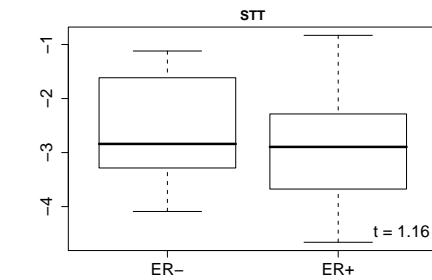

TRIM25

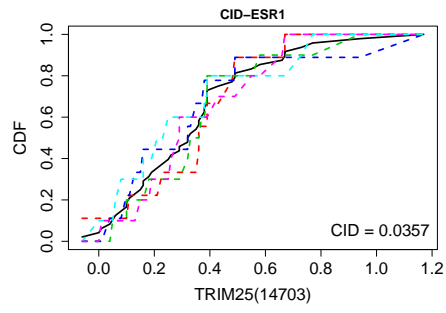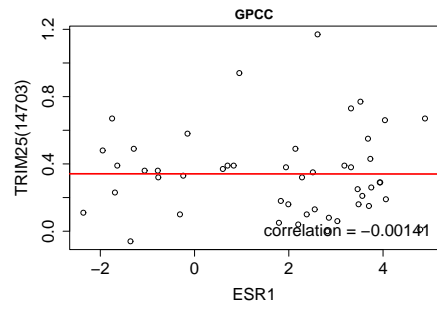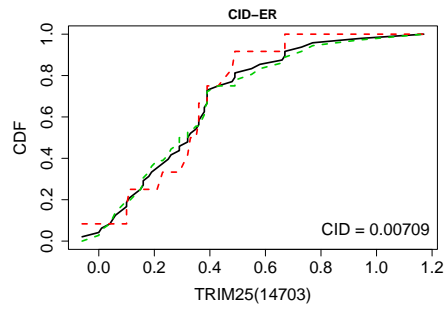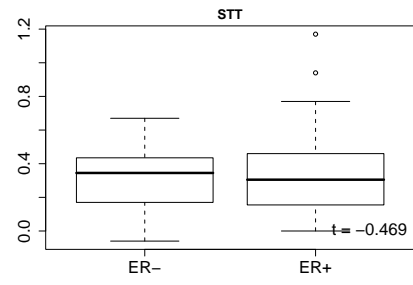

Supplement: 1471-2105-10-85-S2.pdf [file 1471-2105-10-85-S2.pdf]
